# Supplementary material
Source: publisher site journal article supplement (https://www.dovepress.com/article/384463)
Supplement: Supplementary file 1 [file get_supplementary_file.php]

**Supplementary Materials**

**Preoperative chronic pain Assessment**

The following questions regarding preoperative chronic problems were included:

(1) ‘‘Did you suffer any kind of pain problems last more than 3 months? (such as headache, osteoarthritis, burns, peripheral vascular disease, and so on …) ” if the answer was ‘yes’ , then we will continue the following questions 1) “Where do you suffer from chronic pain? ” 2) “How long did your chronic pain last?” Patients with pain in the chest or at the site of the proposed incision are excluded from the procedure.

**Chronic pain and pain-related complications assessment**

The following questions regarding Chronic pain and pain-related complications assessment were included:

1. “Do you still suffer with pain that you relate to your cardiac surgery?” if the answer was ‘yes’ and other causes of pain were excluded (angina or infection), patients were considered to have CPSP, according to IASP definition, then we will continue the following questions 1)“Please rate your cardiac surgery pain only by selecting the numerical rating scale that best describes your average pain in the last one week (0–10, 0: no pain, 10: worst possible pain).”
2. “Do you still suffer with pruritus that you relate to your cardiac surgery?” if say yes ,then “Please rate your cardiac surgery pruritus only by indicating the number that best describes your itch on average in the last one week using the numerical rating scale (0–10, 0: no itch, 10: worst imaginable itch).”
3. “Does pain interfere with your daily activities?” if the answer was ‘yes’ , then “Please rate by selecting the numerical rating scale that best describes the degree of pain interference in daily activities. (0–10, 0: no interference, 10: unable to carry on activities).”
4. “ Does the pain impact your sleep?” if the answer was ‘yes’ , then “Please rate by selecting the numerical rating scale that best describes the degree of pain interference in sleep. (0–10, 0: no interference, 10: worst possible sleep interference).”
